# Supplementary material for: The epigenetic regulator ATF7ip inhibits Il2 expression, regulating Th17 responses
Source: PubMed Central journal article supplement — J Exp Med. 2019 Jun 19;216(9):2024–37. doi: 10.1084/jem.20182316 (PMC6719416; doi:10.1084/jem.20182316), 2019-06-19
Supplement: JEM_20182316_sm.pdf [file JEM_20182316_sm.pdf]

## Supplemental material

Sin et al., <https://doi.org/10.1084/jem.20182316>

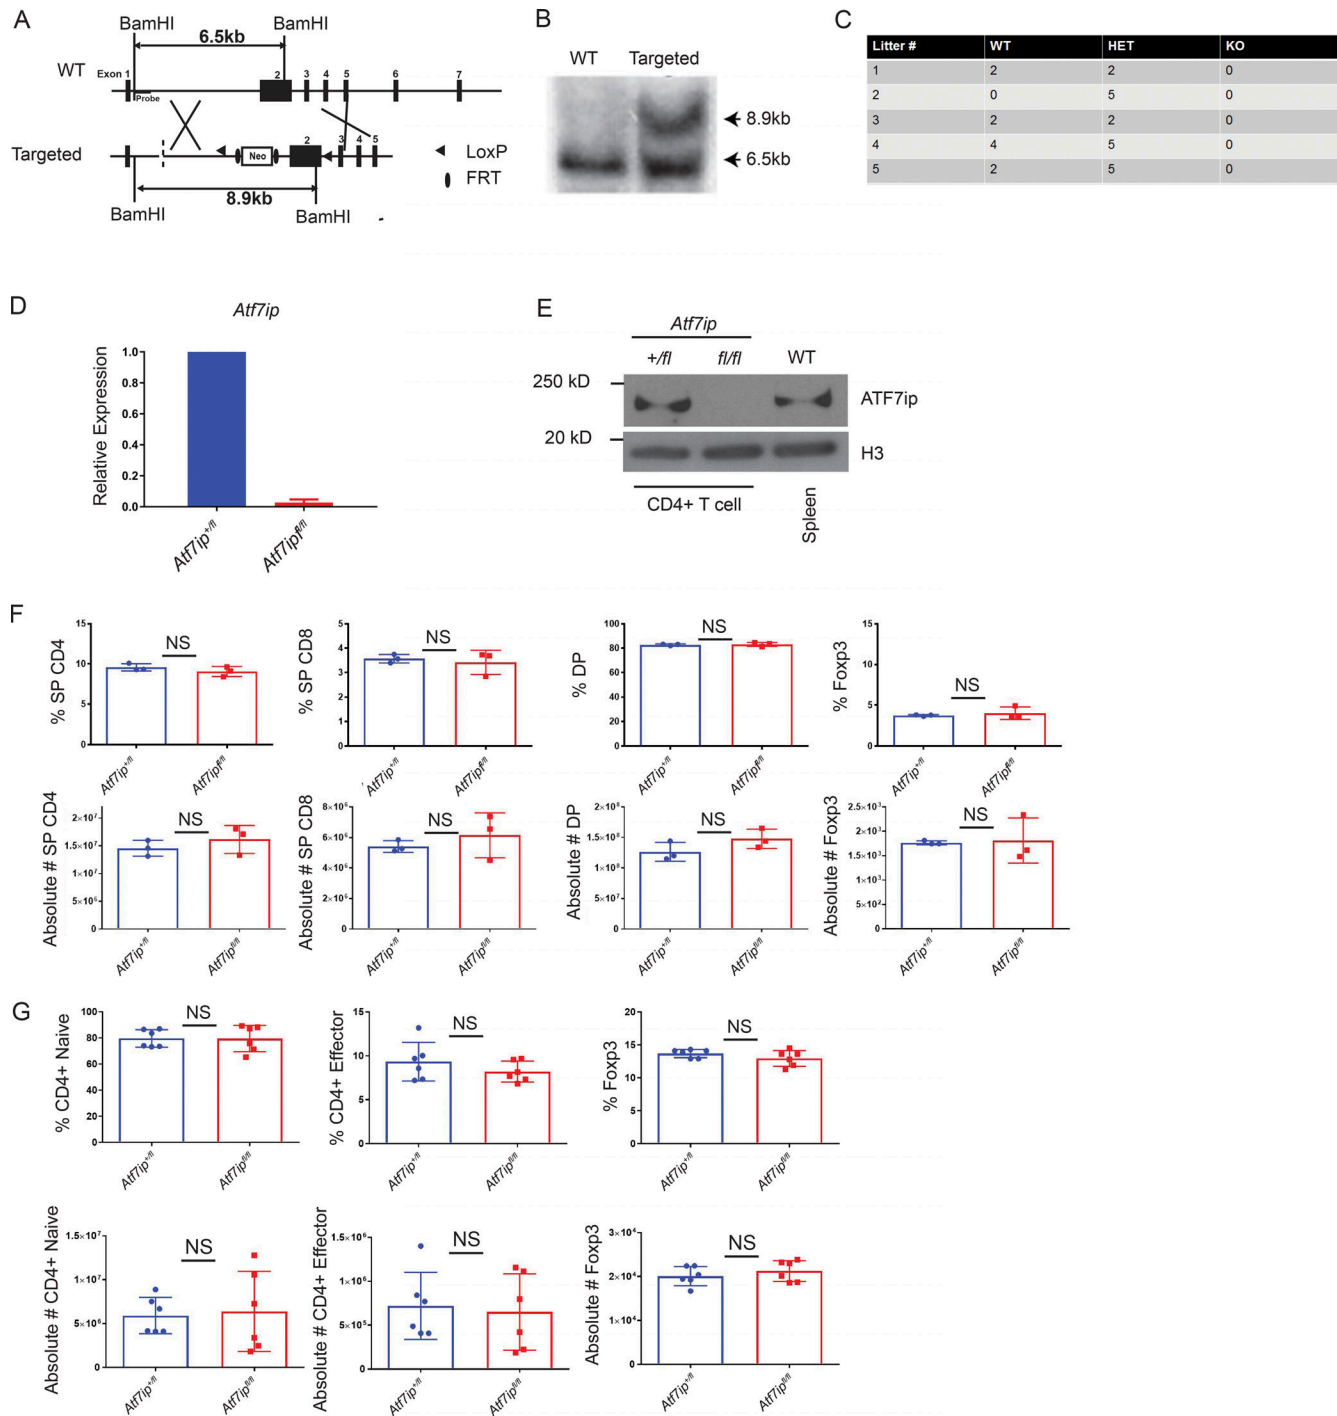

Figure S1. **Creation of an *Atf7ip* conditional KO mouse.** **(A)** Schematic of the *Atf7ip* targeting construct. The 5' end of the targeting construct is shown by the dashed line, with the targeted allele shown below the WT allele. Exon 2 of *Atf7ip* contains the start codon and is flanked by LoxP sites to allow Cre-mediated deletion. The Neo cassette is flanked by FRT sites. **(B)** Southern blot of genomic DNA isolated from ES cell clones that have been targeted with the conditional KO construct and digested with BamHI. Successful targeting of *Atf7ip* introduced a Neo cassette into the *Atf7ip* gene, and a larger 8.9-kb band appeared. **(C)** *Atf7ip*<sup>fl/fl</sup> mice were crossed to transgenic mice expressing Cre recombinase from the zona pellucida 3 promoter to allow oocyte-specific deletion. Chart of the first five litters from *Zp3-Cre/Atf7ip*<sup>±</sup> breeding. **(D)** qPCR assays using RNA prepared from *CD4-Cre/Atf7ip*<sup>+/fl</sup> and *CD4-Cre/Atf7ip*<sup>fl/fl</sup> naive T cells. Gene expression in *CD4-Cre/Atf7ip*<sup>+/fl</sup> naive T cells was normalized to 1. Data are the summary of three independent experiments with SD shown. **(E)** Western blot of chromatin extract for ATf7ip from *CD4-Cre/Atf7ip*<sup>+/fl</sup> and *CD4-Cre/Atf7ip*<sup>fl/fl</sup> T cells as well as splenocytes (spleen) from a WT C57BL/6 mouse. H3 is included as a loading control. **(F)** Summary of flow cytometric analysis of T cell development in 6-wk-old mice: single-positive (SP) CD4, SP CD8, double-positive (DP) T cells, and Foxp3<sup>+</sup> T reg cells. **(G)** Summary of flow cytometric data for the percentage and absolute number of LN naive CD4<sup>+</sup> T cells (CD62L<sup>+</sup>CD44<sup>-</sup>), effector CD4<sup>+</sup> T cells (CD62L<sup>-</sup>CD44<sup>+</sup>), and T reg cells (Foxp3<sup>+</sup>). Each data point in F and G represents an individual mouse with mean and SD shown.

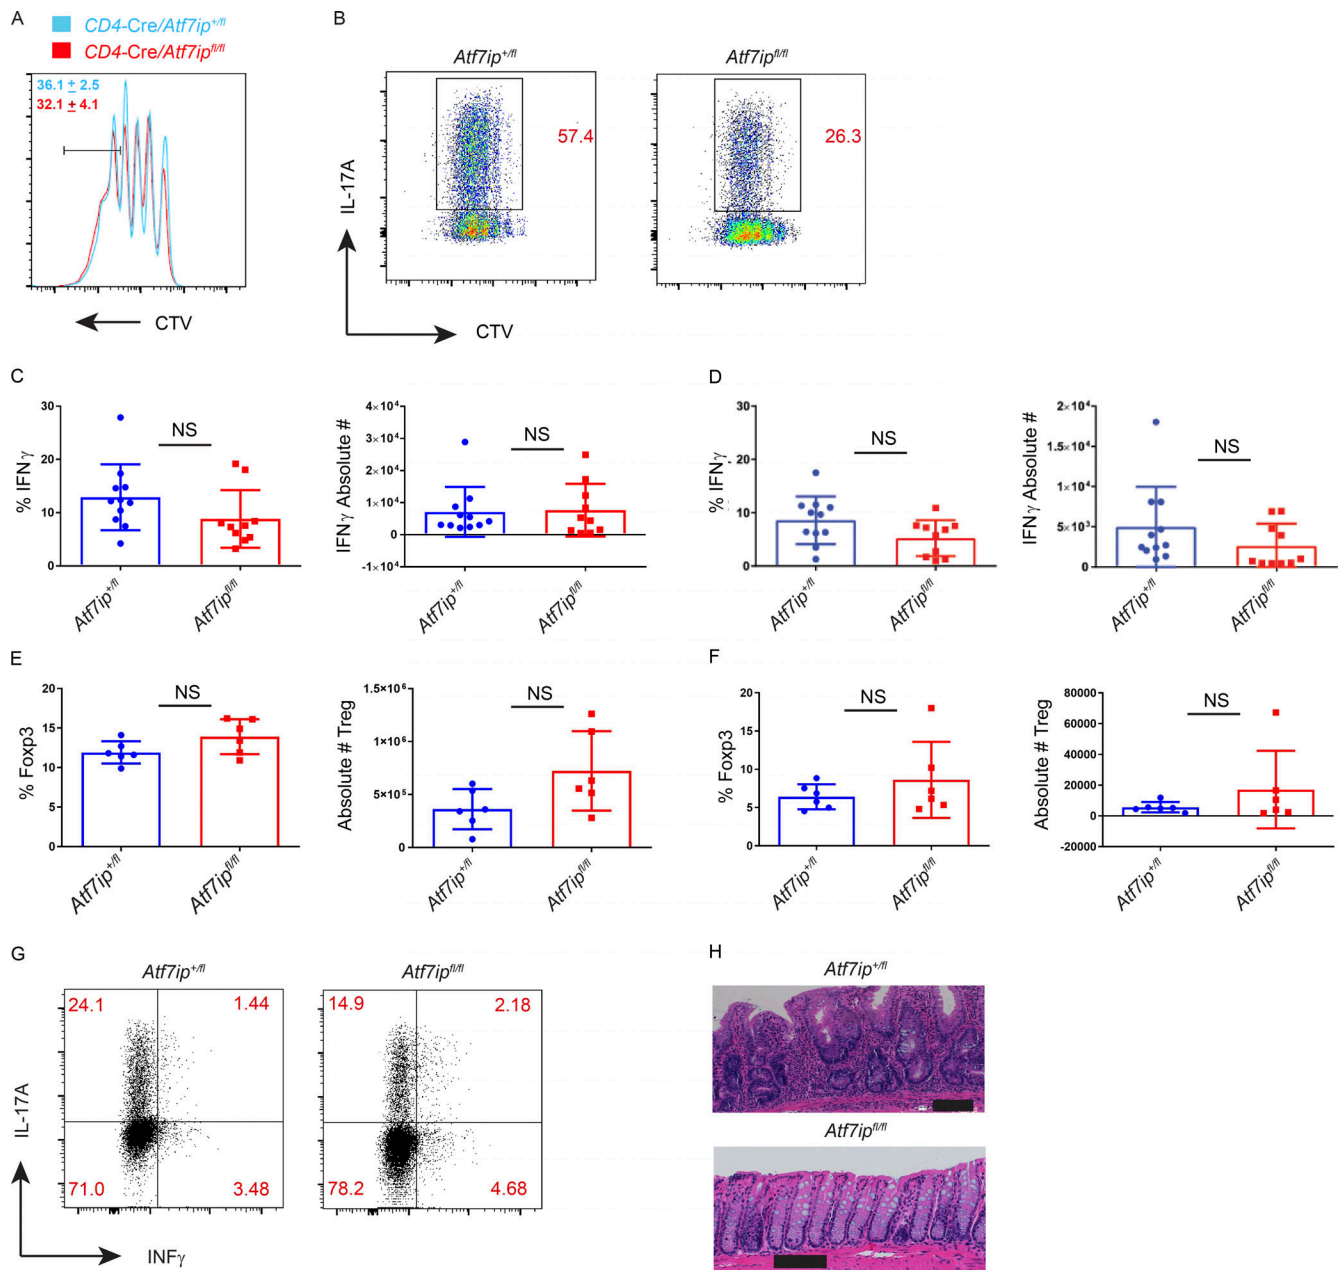

Figure S2. **CD4-Cre/Atf7ip<sup>+/fl</sup> and CD4-Cre/Atf7ip<sup>fl/fl</sup> T cells proliferate similarly.** (A) Naive T cells from CD4-Cre/Atf7ip<sup>+/fl</sup> and CD4-Cre/Atf7ip<sup>fl/fl</sup> mice were labeled with cell trace violet (CTV) and cultured under Th17-inducing conditions for 4 d. Numbers indicate the percentage of cells reaching the final division,  $\pm$  SD. (B) Flow cytometric analysis of CD4<sup>+</sup>CTV<sup>+</sup>IL-17A<sup>+</sup> T cells. (C and D) Percentage and absolute numbers of CD4<sup>+</sup> T cells in the mesenteric LN (C) and small intestine IELs (D) expressing INF $\gamma$  48 h after anti-CD3 treatment. (E and F) Percentage and absolute numbers of CD4<sup>+</sup> T cells in the mesenteric LN (E) and small intestine IELs (F) expressing Foxp3 48 h after anti-CD3 treatment. (G) Percentage of CD4<sup>+</sup>IL17A<sup>+</sup>INF $\gamma$ <sup>+</sup> T cells in the colonic lamina propria of Rag1<sup>-/-</sup> mice. (H) Representative H&E of the colon from Rag1<sup>-/-</sup> recipients. Bars, 100  $\mu$ m. Data in A and B are one representative experiment of two experiments. Data in C and D are the combination of three experiments with three to four mice per group. Data in E and F are the combination of two experiments with three mice per group. Error bars (C, D, E, and F) show mean with SD. Student's *t* test.

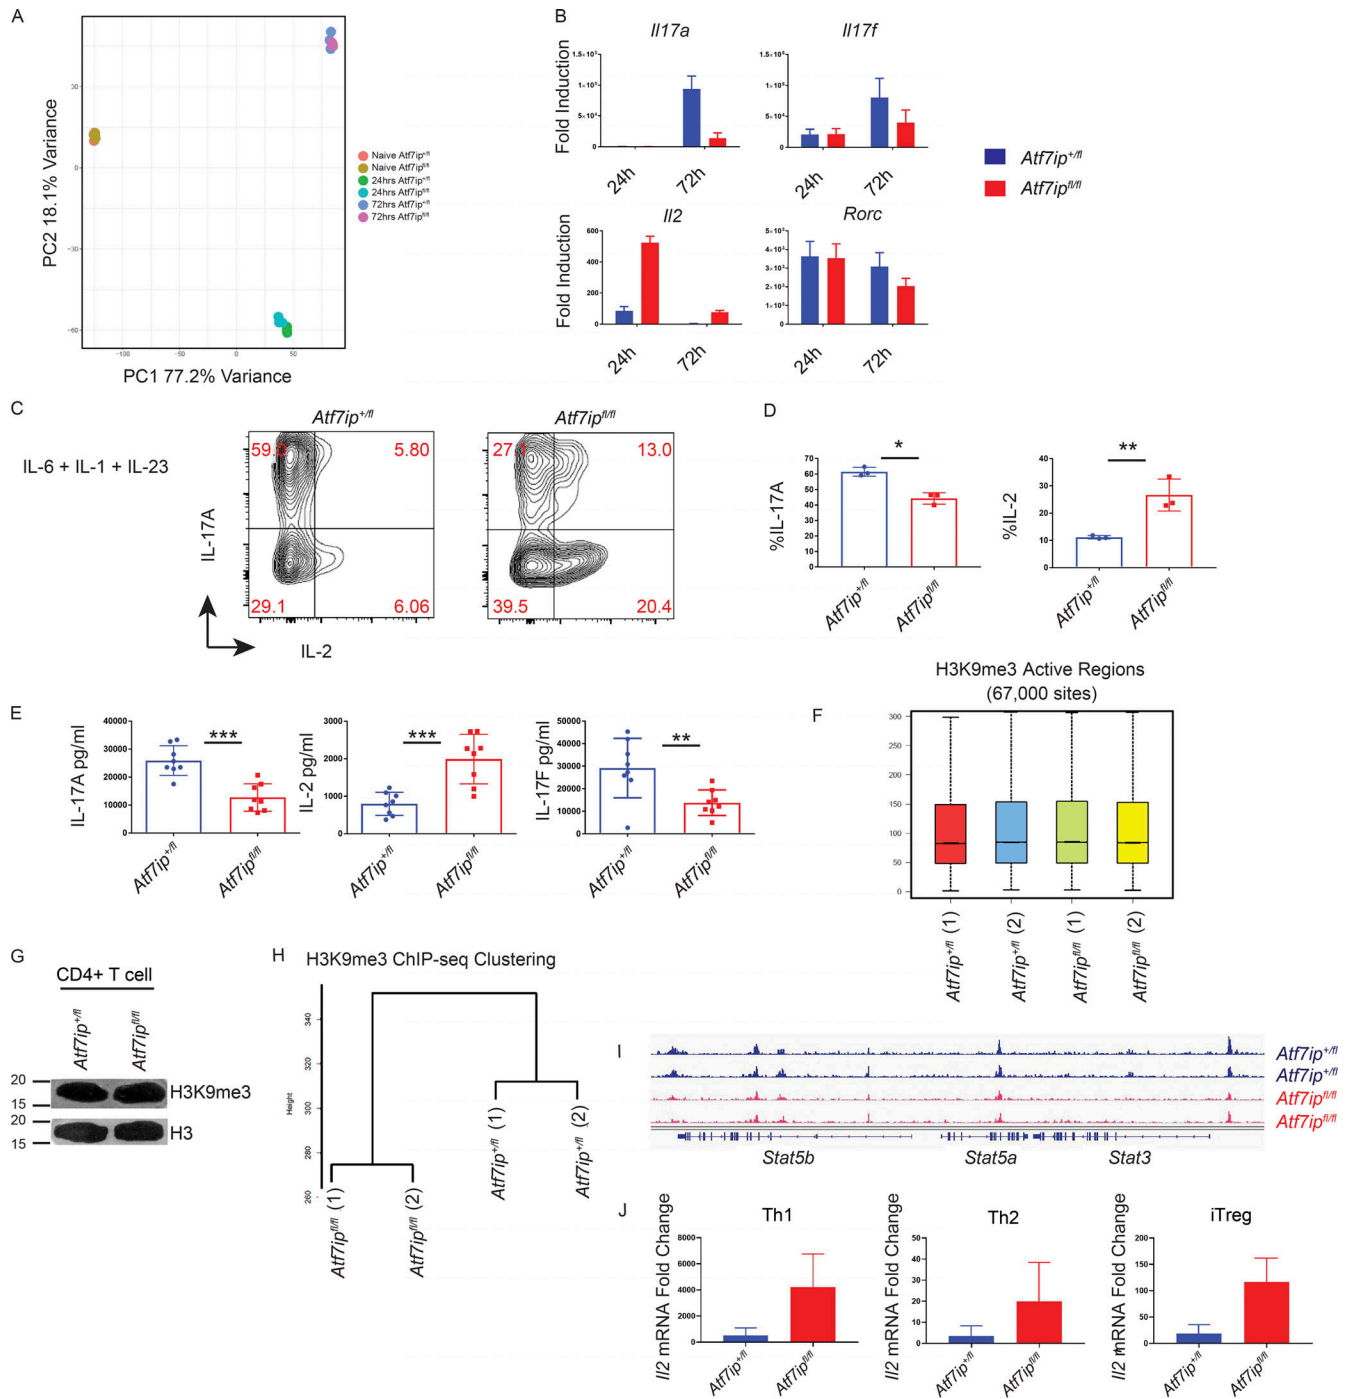

Figure S3. **CD4-Cre/Atf7ip<sup>fl/fl</sup> T cells produce less IL-17.** (A) Principal component analysis of triplicate RNA-seq data. (B) qPCR of select target genes in CD4-Cre/Atf7ip<sup>+/fl</sup> and CD4-Cre/Atf7ip<sup>fl/fl</sup> T cells differentiated under Th17-inducing conditions with IL-6 and TGFβ for the indicated times. Fold induction is relative to naive T cells. (C) Flow cytometric analysis of IL-17A and IL-2 expression in CD4-Cre/Atf7ip<sup>+/fl</sup> and CD4-Cre/Atf7ip<sup>fl/fl</sup> T cells differentiated under pathogenic Th17-inducing conditions with IL-6, IL-1, and IL-23 for 96 h. (D) Summary of IL-17A and IL-2 expression from C, with each dot representing an individual mouse. (E) ELISA for indicated cytokines of culture supernatant of CD4-Cre/Atf7ip<sup>+/fl</sup> and CD4-Cre/Atf7ip<sup>fl/fl</sup> T cells differentiated under pathogenic Th17-inducing conditions for 96 h. Each data point represents an individual mouse. (F and H) H3K9me3 ChIP-seq was performed in duplicate in CD4-Cre/Atf7ip<sup>+/fl</sup> (Atf7ip<sup>+/fl</sup>) and CD4-Cre/Atf7ip<sup>fl/fl</sup> (Atf7ip<sup>fl/fl</sup>) naive T cells. Numbers in parenthesis indicate sample number for a specific genotype. (F) Peak tag number boxplots for individual ChIP-seq samples. (G) Western blot of H3K9me3 and H3 of chromatin extract from naive T cells from mice of the indicated genotype. (H) Sample clustering of individual H3K9me3 ChIP-seq samples. (I) H3K9me3 ChIP-seq tracings for the Stat5b, Stat5a, and Stat3 loci. (J) qPCR of Il2 in CD4-Cre/Atf7ip<sup>+/fl</sup> and CD4-Cre/Atf7ip<sup>fl/fl</sup> T cells differentiated under Th1, Th2, or iTreg cell conditions. Fold induction is relative to naive T cells. Data in B and J are one representative experiment of three experiments with three mice per group. Data in E are the combination of three experiments with two to three mice per group. \*, P < 0.05; \*\*, P < 0.01; \*\*\*, P < 0.001 by Student's t test. Error bars in B and J show SD of technical replicates. Data in D and E show mean with SD.
